# Supplementary material
Source: publisher figshare collection journal article supplement (https://acs.figshare.com/ndownloader/files/5090635)
Supplement: Supplementary file 1 [file 5090635]

##Title:.........
##Communicated to ........
##By ............and Vedavati G. Puranik
##Division of Organic Chemistry:Synthesis and Centre For Materials 
##Characterisation
##National Chemical Laboratory Pune 411 008, India.
 
data_ppy98c 
 
_audit_creation_method            SHELXL-97 
_chemical_name_systematic 
; 
 ? 
; 
_chemical_name_common             ? 
_chemical_melting_point           ? 
_chemical_formula_moiety          '2(C21 H36 N4 O3 S)' 
_chemical_formula_sum 
 'C42 H72 N8 O6 S2' 
_chemical_formula_weight          849.20 
 
loop_ 
 _atom_type_symbol 
 _atom_type_description 
 _atom_type_scat_dispersion_real 
 _atom_type_scat_dispersion_imag 
 _atom_type_scat_source 
 'C'  'C'   0.0033   0.0016 
 'International Tables Vol C Tables 4.2.6.8 and 6.1.1.4' 
 'N'  'N'   0.0061   0.0033 
 'International Tables Vol C Tables 4.2.6.8 and 6.1.1.4' 
 'O'  'O'   0.0106   0.0060 
 'International Tables Vol C Tables 4.2.6.8 and 6.1.1.4' 
 'S'  'S'   0.1246   0.1234 
 'International Tables Vol C Tables 4.2.6.8 and 6.1.1.4' 
 'H'  'H'   0.0000   0.0000 
 'International Tables Vol C Tables 4.2.6.8 and 6.1.1.4' 
 
_symmetry_cell_setting            'Triclinic' 
_symmetry_space_group_name_H-M    'P-1' 
 
loop_ 
 _symmetry_equiv_pos_as_xyz 
 'x, y, z' 
 '-x, -y, -z' 
 
_cell_length_a                    10.2504(6) 
_cell_length_b                    13.3758(8) 
_cell_length_c                    17.8220(10) 
_cell_angle_alpha                 90.9410(10) 
_cell_angle_beta                  94.7990(10) 
_cell_angle_gamma                 99.7730(10) 
_cell_volume                      2398.5(2) 
_cell_formula_units_Z             2 
_cell_measurement_temperature     293(2) 
_cell_measurement_reflns_used     '3534' 
_cell_measurement_theta_min       '2.237'
_cell_measurement_theta_max       '20.513' 
 
_exptl_crystal_description        'needle' 
_exptl_crystal_colour             'colorless' 
_exptl_crystal_size_max           0.52 
_exptl_crystal_size_mid           0.10 
_exptl_crystal_size_min           0.05 
_exptl_crystal_density_meas       ? 
_exptl_crystal_density_diffrn     1.176 
_exptl_crystal_density_method     'not measured' 
_exptl_crystal_F_000              920 
_exptl_absorpt_coefficient_mu     0.162 
_exptl_absorpt_correction_type    'multi-scan' 
_exptl_absorpt_correction_T_min   0.9210 
_exptl_absorpt_correction_T_max   0.9916 
_exptl_absorpt_process_details    'Bruker SADABS' 
 
_exptl_special_details 
; 
 ? 
; 
 
_diffrn_ambient_temperature       293(2) 
_diffrn_radiation_wavelength      0.71073 
_diffrn_radiation_type            MoK\a 
_diffrn_radiation_source          'fine-focus sealed tube' 
_diffrn_radiation_monochromator   graphite 
_diffrn_measurement_device_type   ' CCD Area Detector'
_diffrn_measurement_device        ' Bruker Smart APEX'  
_diffrn_measurement_method        'Omega Scan'
_diffrn_detector_area_resol_mean  ? 
_diffrn_standards_number          ? 
_diffrn_standards_interval_count  ? 
_diffrn_standards_interval_time   ? 
_diffrn_standards_decay_%         ? 
_diffrn_reflns_number             26145 
_diffrn_reflns_av_R_equivalents   0.0460 
_diffrn_reflns_av_sigmaI/netI     0.0544 
_diffrn_reflns_limit_h_min        -12 
_diffrn_reflns_limit_h_max        12 
_diffrn_reflns_limit_k_min        -15 
_diffrn_reflns_limit_k_max        15 
_diffrn_reflns_limit_l_min        -21 
_diffrn_reflns_limit_l_max        21 
_diffrn_reflns_theta_min          1.55 
_diffrn_reflns_theta_max          25.00 
_reflns_number_total              8428 
_reflns_number_gt                 5371 
_reflns_threshold_expression      >2sigma(I) 
 
_computing_data_collection        'BRUKER SMART' 
_computing_cell_refinement        'BRUKER SAINT'  
_computing_data_reduction         'BRUKER SAINT' 
_computing_structure_solution     'SHELXS-97 (Sheldrick, 1990)' 
_computing_structure_refinement   'SHELXL-97 (Sheldrick, 1997)' 
_computing_molecular_graphics     'SHELXTL and PLATON' 
_computing_publication_material   'SHELXTL' 
 
_refine_special_details 
; 
 Refinement of F^2^ against ALL reflections.  The weighted R-factor wR and 
 goodness of fit S are based on F^2^, conventional R-factors R are based 
 on F, with F set to zero for negative F^2^. The threshold expression of 
 F^2^ > 2sigma(F^2^) is used only for calculating R-factors(gt) etc. and is 
 not relevant to the choice of reflections for refinement.  R-factors based 
 on F^2^ are statistically about twice as large as those based on F, and R- 
 factors based on ALL data will be even larger. 
; 
 
_refine_ls_structure_factor_coef  Fsqd  
_refine_ls_matrix_type            full 
_refine_ls_weighting_scheme       calc  
_refine_ls_weighting_details 
 'calc w=1/[\s^2^(Fo^2^)+(0.1419P)^2^+1.4392P] where P=(Fo^2^+2Fc^2^)/3' 
_atom_sites_solution_primary      direct 
_atom_sites_solution_secondary    difmap 
_atom_sites_solution_hydrogens    geom 
_refine_ls_hydrogen_treatment     mixed 
_refine_ls_extinction_method      none 
_refine_ls_extinction_coef        ? 
_refine_ls_number_reflns          8428 
_refine_ls_number_parameters      563 
_refine_ls_number_restraints      110 
_refine_ls_R_factor_all           0.1393 
_refine_ls_R_factor_gt            0.0939 
_refine_ls_wR_factor_ref          0.2756 
_refine_ls_wR_factor_gt           0.2446 
_refine_ls_goodness_of_fit_ref    1.046 
_refine_ls_restrained_S_all       1.077 
_refine_ls_shift/su_max           0.132 
_refine_ls_shift/su_mean          0.011 
 
loop_ 
 _atom_site_label 
 _atom_site_type_symbol 
 _atom_site_fract_x 
 _atom_site_fract_y 
 _atom_site_fract_z 
 _atom_site_U_iso_or_equiv 
 _atom_site_adp_type 
 _atom_site_occupancy 
 _atom_site_symmetry_multiplicity 
 _atom_site_calc_flag 
 _atom_site_refinement_flags 
 _atom_site_disorder_assembly 
 _atom_site_disorder_group 
S1 S 0.95224(11) 0.77219(10) 0.51889(7) 0.0678(4) Uani 1 1 d . . . 
O1 O 0.9411(3) 1.0475(3) 0.3047(2) 0.0822(10) Uani 1 1 d . . . 
O2 O 1.0930(3) 0.8043(3) 0.5190(2) 0.0859(11) Uani 1 1 d . . . 
O3 O 0.9023(3) 0.7505(3) 0.58978(19) 0.0799(10) Uani 1 1 d . . . 
N1 N 0.7202(4) 1.0434(3) 0.2946(2) 0.0668(11) Uani 1 1 d . . . 
H1 H 0.6462 1.0228 0.3135 0.080 Uiso 1 1 calc R . . 
N2 N 0.8132(3) 0.9523(3) 0.3864(2) 0.0587(10) Uani 1 1 d . . . 
H2 H 0.7354 0.9413 0.4025 0.070 Uiso 1 1 calc R . . 
N3 N 1.0269(4) 0.9189(3) 0.3976(3) 0.0804(13) Uani 1 1 d . . . 
H3A H 1.0885 0.8907 0.4196 0.097 Uiso 1 1 calc R . . 
H3B H 1.0430 0.9563 0.3595 0.097 Uiso 1 1 calc R . . 
N4 N 0.8670(3) 0.8500(3) 0.4801(2) 0.0647(10) Uani 1 1 d . . . 
C1 C 0.8306(4) 1.0171(3) 0.3256(3) 0.0596(12) Uani 1 1 d . . . 
C2 C 0.9070(4) 0.9049(3) 0.4225(3) 0.0599(12) Uani 1 1 d . . . 
C3 C 0.9111(5) 0.6597(4) 0.4635(3) 0.0752(14) Uani 1 1 d D . . 
C4 C 0.9762(10) 0.6459(8) 0.4020(5) 0.209(6) Uani 1 1 d DU . . 
H4 H 1.0421 0.6971 0.3880 0.251 Uiso 1 1 calc R . . 
C5 C 0.9444(12) 0.5540(9) 0.3592(6) 0.199(5) Uani 1 1 d DU . . 
H5 H 0.9864 0.5457 0.3158 0.238 Uiso 1 1 calc R A . 
C6 C 0.8512(11) 0.4769(6) 0.3819(6) 0.125(3) Uani 1 1 d D A . 
C7 C 0.806(3) 0.506(2) 0.4469(14) 0.230(11) Uani 0.50 1 d PDU A 1 
H7 H 0.7494 0.4551 0.4686 0.276 Uiso 0.50 1 calc PR A 1 
C8 C 0.829(3) 0.601(2) 0.4879(15) 0.221(11) Uani 0.50 1 d PDU A 1 
H8 H 0.7839 0.6140 0.5292 0.265 Uiso 0.50 1 calc PR A 1 
C7' C 0.783(3) 0.479(2) 0.4271(15) 0.236(12) Uani 0.50 1 d PDU A 2 
H7' H 0.7106 0.4282 0.4339 0.284 Uiso 0.50 1 calc PR A 2 
C8' C 0.819(3) 0.568(2) 0.4722(14) 0.203(10) Uani 0.50 1 d PDU A 2 
H8' H 0.7763 0.5667 0.5161 0.243 Uiso 0.50 1 calc PR A 2 
C9 C 0.8185(13) 0.3772(7) 0.3325(5) 0.194(5) Uani 1 1 d . . . 
H9A H 0.8572 0.3249 0.3575 0.291 Uiso 1 1 calc R A . 
H9B H 0.8543 0.3888 0.2847 0.291 Uiso 1 1 calc R . . 
H9C H 0.7239 0.3564 0.3247 0.291 Uiso 1 1 calc R . . 
C10 C 0.7222(5) 1.1066(4) 0.2289(3) 0.0767(14) Uani 1 1 d . . . 
H10A H 0.7996 1.1599 0.2354 0.092 Uiso 1 1 calc R . . 
H10B H 0.6440 1.1388 0.2259 0.092 Uiso 1 1 calc R . . 
C11 C 0.7253(7) 1.0484(5) 0.1551(4) 0.108(2) Uani 1 1 d . . . 
H11A H 0.7334 1.0972 0.1154 0.129 Uiso 1 1 calc R . . 
H11B H 0.8054 1.0186 0.1585 0.129 Uiso 1 1 calc R . . 
C12 C 0.6151(7) 0.9692(5) 0.1320(4) 0.110(2) Uani 1 1 d . . . 
H12A H 0.5352 0.9991 0.1265 0.131 Uiso 1 1 calc R . . 
H12B H 0.6048 0.9213 0.1723 0.131 Uiso 1 1 calc R . . 
C13 C 0.6237(7) 0.9104(5) 0.0597(4) 0.107(2) Uani 1 1 d . . . 
H13A H 0.6287 0.9580 0.0191 0.129 Uiso 1 1 calc R . . 
H13B H 0.7067 0.8844 0.0641 0.129 Uiso 1 1 calc R . . 
C14 C 0.5182(8) 0.8263(6) 0.0373(4) 0.126(3) Uani 1 1 d . . . 
H14A H 0.4365 0.8536 0.0289 0.151 Uiso 1 1 calc R . . 
H14B H 0.5082 0.7821 0.0798 0.151 Uiso 1 1 calc R . . 
C15 C 0.5288(8) 0.7618(6) -0.0302(4) 0.123(2) Uani 1 1 d . . . 
H15A H 0.5277 0.8037 -0.0741 0.148 Uiso 1 1 calc R . . 
H15B H 0.6147 0.7402 -0.0249 0.148 Uiso 1 1 calc R . . 
C16 C 0.4262(9) 0.6708(7) -0.0456(5) 0.139(3) Uani 1 1 d . . . 
H16A H 0.4225 0.6325 0.0002 0.167 Uiso 1 1 calc R . . 
H16B H 0.3415 0.6936 -0.0546 0.167 Uiso 1 1 calc R . . 
C17 C 0.4364(8) 0.5996(7) -0.1078(5) 0.135(3) Uani 1 1 d . . . 
H17A H 0.5249 0.5826 -0.1024 0.162 Uiso 1 1 calc R . . 
H17B H 0.4287 0.6352 -0.1545 0.162 Uiso 1 1 calc R . . 
C18 C 0.3396(9) 0.5030(7) -0.1161(5) 0.152(3) Uani 1 1 d . . . 
H18A H 0.3465 0.4695 -0.0684 0.183 Uiso 1 1 calc R . . 
H18B H 0.2518 0.5214 -0.1215 0.183 Uiso 1 1 calc R . . 
C19 C 0.3418(10) 0.4282(8) -0.1735(6) 0.162(4) Uani 1 1 d . . . 
H19A H 0.4307 0.4119 -0.1698 0.195 Uiso 1 1 calc R . . 
H19B H 0.3299 0.4604 -0.2214 0.195 Uiso 1 1 calc R . . 
C20 C 0.2512(11) 0.3339(8) -0.1780(7) 0.182(4) Uani 1 1 d . . . 
H20A H 0.2670 0.3000 -0.1313 0.219 Uiso 1 1 calc R . . 
H20B H 0.1626 0.3504 -0.1785 0.219 Uiso 1 1 calc R . . 
C21 C 0.2475(13) 0.2608(8) -0.2375(7) 0.218(6) Uani 1 1 d . . . 
H21A H 0.2341 0.2918 -0.2850 0.327 Uiso 1 1 calc R . . 
H21B H 0.1758 0.2055 -0.2326 0.327 Uiso 1 1 calc R . . 
H21C H 0.3300 0.2357 -0.2349 0.327 Uiso 1 1 calc R . . 
S2 S 0.57129(10) 1.14745(8) 0.61490(7) 0.0568(4) Uani 1 1 d . B . 
O4 O 0.4710(3) 1.1572(3) 0.31729(18) 0.0718(9) Uani 1 1 d . . . 
O5 O 0.6974(3) 1.1248(3) 0.5975(2) 0.0789(10) Uani 1 1 d . . . 
O6 O 0.5182(3) 1.1022(2) 0.68021(18) 0.0731(9) Uani 1 1 d . . . 
N5 N 0.2475(3) 1.1324(3) 0.3152(2) 0.0601(10) Uani 1 1 d . . . 
H5A H 0.1795 1.1212 0.3409 0.072 Uiso 1 1 calc R . . 
N6 N 0.3720(3) 1.1368(3) 0.42823(19) 0.0542(9) Uani 1 1 d . . . 
H6 H 0.2974 1.1316 0.4478 0.065 Uiso 1 1 calc R . . 
N7 N 0.6000(3) 1.1565(3) 0.4505(2) 0.0688(11) Uani 1 1 d . . . 
H7A H 0.6704 1.1576 0.4806 0.083 Uiso 1 1 calc R . . 
H7B H 0.6067 1.1673 0.4034 0.083 Uiso 1 1 calc R . . 
N8 N 0.4573(3) 1.1205(3) 0.5477(2) 0.0558(9) Uani 1 1 d . . . 
C22 C 0.3686(4) 1.1427(3) 0.3500(3) 0.0555(11) Uani 1 1 d . . . 
C23 C 0.4830(4) 1.1385(3) 0.4763(3) 0.0524(10) Uani 1 1 d . . . 
C24 C 0.5911(5) 1.2787(4) 0.6285(3) 0.0668(13) Uani 1 1 d D . . 
C25 C 0.4876(11) 1.3247(7) 0.6220(7) 0.339(10) Uani 1 1 d DU B 5 
H25 H 0.4054 1.2838 0.6102 0.407 Uiso 1 1 calc R B 5 
C26 C 0.4880(13) 1.4283(9) 0.6311(9) 0.324(9) Uani 1 1 d DU B 5 
H26 H 0.4121 1.4576 0.6233 0.388 Uiso 1 1 calc R B 5 
C27 C 0.6227(12) 1.4876(6) 0.6546(6) 0.147(4) Uani 1 1 d DU . . 
C28 C 0.693(2) 1.4448(16) 0.6807(14) 0.190(9) Uani 0.50 1 d PDU B 3 
H28 H 0.7562 1.4778 0.7173 0.228 Uiso 0.50 1 calc PR B 3 
C29 C 0.6947(17) 1.3450(14) 0.6639(12) 0.167(8) Uani 0.50 1 d PDU B 3 
H29 H 0.7726 1.3204 0.6777 0.200 Uiso 0.50 1 calc PR B 3 
C28' C 0.7114(16) 1.4388(13) 0.6265(14) 0.154(7) Uani 0.50 1 d PDU B 4 
H28' H 0.7898 1.4791 0.6149 0.184 Uiso 0.50 1 calc PR B 4 
C29' C 0.7016(15) 1.3314(12) 0.6118(13) 0.159(8) Uani 0.50 1 d PDU B 4 
H29' H 0.7686 1.3029 0.5921 0.191 Uiso 0.50 1 calc PR B 4 
C30 C 0.6363(13) 1.6018(6) 0.6696(7) 0.222(6) Uani 1 1 d . B . 
H30A H 0.7241 1.6345 0.6603 0.333 Uiso 1 1 calc R . . 
H30B H 0.6214 1.6145 0.7211 0.333 Uiso 1 1 calc R . . 
H30C H 0.5720 1.6282 0.6368 0.333 Uiso 1 1 calc R . . 
C31 C 0.2286(5) 1.1399(4) 0.2333(3) 0.0766(14) Uani 1 1 d . . . 
H31A H 0.2831 1.2017 0.2185 0.092 Uiso 1 1 calc R . . 
H31B H 0.1365 1.1446 0.2191 0.092 Uiso 1 1 calc R . . 
C32 C 0.2637(5) 1.0509(5) 0.1909(3) 0.0821(16) Uani 1 1 d . . . 
H32A H 0.2581 1.0647 0.1376 0.099 Uiso 1 1 calc R . . 
H32B H 0.3552 1.0456 0.2063 0.099 Uiso 1 1 calc R . . 
C33 C 0.1791(6) 0.9518(5) 0.2019(3) 0.0878(16) Uani 1 1 d . . . 
H33A H 0.0881 0.9550 0.1835 0.105 Uiso 1 1 calc R . . 
H33B H 0.1805 0.9390 0.2554 0.105 Uiso 1 1 calc R . . 
C34 C 0.2240(6) 0.8644(5) 0.1616(4) 0.0997(19) Uani 1 1 d . . . 
H34A H 0.2244 0.8786 0.1084 0.120 Uiso 1 1 calc R . . 
H34B H 0.3147 0.8615 0.1806 0.120 Uiso 1 1 calc R . . 
C35 C 0.1410(7) 0.7629(5) 0.1698(4) 0.115(2) Uani 1 1 d . . . 
H35A H 0.0512 0.7645 0.1483 0.138 Uiso 1 1 calc R . . 
H35B H 0.1370 0.7499 0.2230 0.138 Uiso 1 1 calc R . . 
C36 C 0.1916(9) 0.6765(6) 0.1324(5) 0.132(3) Uani 1 1 d . . . 
H36A H 0.2803 0.6737 0.1550 0.158 Uiso 1 1 calc R . . 
H36B H 0.1987 0.6909 0.0796 0.158 Uiso 1 1 calc R . . 
C37 C 0.1058(9) 0.5734(7) 0.1380(5) 0.150(3) Uani 1 1 d . . . 
H37A H 0.1005 0.5587 0.1908 0.180 Uiso 1 1 calc R . . 
H37B H 0.0166 0.5771 0.1165 0.180 Uiso 1 1 calc R . . 
C38 C 0.1517(11) 0.4872(7) 0.1000(6) 0.166(4) Uani 1 1 d . . . 
H38A H 0.2379 0.4793 0.1238 0.199 Uiso 1 1 calc R . . 
H38B H 0.1624 0.5029 0.0477 0.199 Uiso 1 1 calc R . . 
C39 C 0.0540(11) 0.3861(8) 0.1035(7) 0.183(4) Uani 1 1 d . . . 
H39A H 0.0503 0.3678 0.1558 0.220 Uiso 1 1 calc R . . 
H39B H -0.0340 0.3968 0.0847 0.220 Uiso 1 1 calc R . . 
C40 C 0.0872(11) 0.3012(9) 0.0609(7) 0.171(4) Uani 1 1 d . . . 
H40A H 0.1705 0.2846 0.0828 0.205 Uiso 1 1 calc R . . 
H40B H 0.0989 0.3206 0.0094 0.205 Uiso 1 1 calc R . . 
C41 C -0.0174(12) 0.2116(11) 0.0611(8) 0.188(5) Uani 1 1 d . . . 
H41A H -0.0318 0.1940 0.1127 0.225 Uiso 1 1 calc R . . 
H41B H -0.0997 0.2273 0.0372 0.225 Uiso 1 1 calc R . . 
C42 C 0.0179(13) 0.1269(12) 0.0220(8) 0.218(6) Uani 1 1 d . . . 
H42A H -0.0013 0.1328 -0.0312 0.328 Uiso 1 1 calc R . . 
H42B H -0.0325 0.0651 0.0382 0.328 Uiso 1 1 calc R . . 
H42C H 0.1110 0.1262 0.0329 0.328 Uiso 1 1 calc R . . 
 
loop_ 
 _atom_site_aniso_label 
 _atom_site_aniso_U_11 
 _atom_site_aniso_U_22 
 _atom_site_aniso_U_33 
 _atom_site_aniso_U_23 
 _atom_site_aniso_U_13 
 _atom_site_aniso_U_12 
S1 0.0443(6) 0.0861(9) 0.0759(9) -0.0030(7) 0.0081(6) 0.0184(6) 
O1 0.0520(19) 0.082(2) 0.114(3) 0.014(2) 0.0322(19) 0.0038(16) 
O2 0.0438(18) 0.117(3) 0.100(3) 0.006(2) 0.0042(17) 0.0218(18) 
O3 0.068(2) 0.103(3) 0.074(2) -0.0014(19) 0.0106(17) 0.0246(18) 
N1 0.048(2) 0.069(2) 0.086(3) 0.004(2) 0.023(2) 0.0090(18) 
N2 0.0369(18) 0.057(2) 0.082(3) -0.0037(19) 0.0149(17) 0.0058(16) 
N3 0.042(2) 0.102(3) 0.102(3) 0.014(3) 0.019(2) 0.019(2) 
N4 0.042(2) 0.076(3) 0.080(3) 0.002(2) 0.0155(19) 0.0147(18) 
C1 0.048(3) 0.049(2) 0.082(3) -0.006(2) 0.021(2) 0.0021(19) 
C2 0.037(2) 0.056(3) 0.085(3) -0.017(2) 0.009(2) 0.0044(19) 
C3 0.068(3) 0.085(4) 0.078(4) 0.004(3) 0.009(3) 0.028(3) 
C4 0.259(12) 0.162(9) 0.208(11) -0.075(8) 0.130(10) -0.004(8) 
C5 0.283(14) 0.166(10) 0.164(9) -0.050(8) 0.086(9) 0.060(10) 
C6 0.175(8) 0.080(5) 0.125(7) 0.005(5) 0.000(6) 0.038(5) 
C7 0.303(19) 0.128(17) 0.207(18) -0.154(14) 0.128(16) -0.147(14) 
C8 0.279(19) 0.139(18) 0.201(17) -0.162(13) 0.143(15) -0.134(15) 
C7' 0.30(2) 0.146(18) 0.22(2) -0.160(15) 0.155(18) -0.144(15) 
C8' 0.243(16) 0.129(18) 0.192(17) -0.140(14) 0.147(14) -0.140(13) 
C9 0.314(15) 0.113(7) 0.155(8) -0.038(6) -0.052(9) 0.075(8) 
C10 0.075(3) 0.075(3) 0.088(4) 0.015(3) 0.029(3) 0.022(3) 
C11 0.107(5) 0.113(5) 0.102(5) 0.018(4) 0.026(4) 0.007(4) 
C12 0.112(5) 0.099(5) 0.117(5) -0.009(4) 0.046(4) 0.000(4) 
C13 0.094(5) 0.115(5) 0.107(5) -0.009(4) 0.015(4) 0.002(4) 
C14 0.129(6) 0.118(6) 0.127(6) -0.028(5) 0.038(5) 0.004(5) 
C15 0.111(5) 0.138(6) 0.116(6) -0.023(5) 0.025(4) 0.001(5) 
C16 0.133(7) 0.131(6) 0.151(7) -0.031(6) 0.039(5) 0.005(5) 
C17 0.138(7) 0.137(7) 0.123(6) -0.040(5) 0.012(5) 0.006(6) 
C18 0.151(8) 0.141(8) 0.163(8) -0.042(6) 0.027(6) 0.017(6) 
C19 0.180(9) 0.144(8) 0.158(8) -0.059(7) 0.010(7) 0.023(7) 
C20 0.190(10) 0.123(7) 0.227(12) -0.045(8) 0.044(9) -0.002(7) 
C21 0.270(15) 0.139(9) 0.240(13) -0.057(9) 0.040(11) 0.015(9) 
S2 0.0386(6) 0.0609(7) 0.0697(8) 0.0090(5) 0.0047(5) 0.0049(5) 
O4 0.0494(18) 0.096(2) 0.069(2) -0.0004(18) 0.0169(16) 0.0049(16) 
O5 0.0427(17) 0.095(2) 0.102(3) 0.012(2) 0.0066(16) 0.0202(16) 
O6 0.0568(18) 0.079(2) 0.079(2) 0.0229(18) 0.0008(16) -0.0002(16) 
N5 0.047(2) 0.076(3) 0.056(2) 0.0004(18) 0.0075(17) 0.0075(17) 
N6 0.0366(18) 0.067(2) 0.058(2) -0.0056(17) 0.0061(16) 0.0064(15) 
N7 0.039(2) 0.096(3) 0.071(3) 0.004(2) 0.0086(18) 0.0109(19) 
N8 0.0390(18) 0.060(2) 0.068(2) -0.0023(18) 0.0071(17) 0.0070(15) 
C22 0.051(3) 0.050(2) 0.065(3) -0.005(2) 0.010(2) 0.0071(19) 
C23 0.041(2) 0.045(2) 0.072(3) -0.007(2) 0.011(2) 0.0076(17) 
C24 0.058(3) 0.065(3) 0.073(3) -0.006(2) 0.017(2) -0.004(2) 
C25 0.210(12) 0.087(7) 0.73(3) -0.121(12) 0.203(16) -0.011(7) 
C26 0.266(14) 0.118(8) 0.60(2) -0.103(12) 0.196(16) -0.004(9) 
C27 0.181(9) 0.062(5) 0.194(9) -0.014(5) 0.094(8) -0.021(5) 
C28 0.249(18) 0.085(11) 0.207(17) -0.097(12) -0.130(14) 0.033(11) 
C29 0.170(14) 0.093(11) 0.220(18) -0.072(12) -0.117(13) 0.046(10) 
C28' 0.150(12) 0.066(9) 0.227(17) -0.032(11) 0.051(12) -0.045(9) 
C29' 0.144(12) 0.074(9) 0.247(19) -0.067(11) 0.104(13) -0.052(8) 
C30 0.330(16) 0.068(5) 0.263(13) -0.045(6) 0.148(12) -0.032(7) 
C31 0.070(3) 0.094(4) 0.066(3) 0.008(3) 0.006(2) 0.013(3) 
C32 0.071(3) 0.114(4) 0.056(3) -0.009(3) 0.005(2) 0.000(3) 
C33 0.076(4) 0.110(5) 0.074(4) -0.013(3) 0.011(3) 0.006(3) 
C34 0.088(4) 0.117(5) 0.088(4) -0.030(4) 0.013(3) -0.001(4) 
C35 0.116(5) 0.113(5) 0.113(5) -0.014(4) 0.028(4) 0.009(4) 
C36 0.141(7) 0.108(6) 0.145(7) -0.023(5) 0.040(5) 0.008(5) 
C37 0.143(7) 0.140(8) 0.169(8) -0.012(6) 0.039(6) 0.022(6) 
C38 0.186(9) 0.120(7) 0.196(10) -0.018(7) 0.058(8) 0.022(7) 
C39 0.182(10) 0.148(9) 0.226(12) -0.013(8) 0.076(9) 0.022(8) 
C40 0.150(9) 0.174(10) 0.187(10) 0.020(8) 0.030(7) 0.016(8) 
C41 0.144(9) 0.192(12) 0.214(13) 0.044(10) 0.020(8) -0.014(9) 
C42 0.180(12) 0.260(17) 0.226(15) 0.079(13) 0.013(10) 0.063(11) 
 
_geom_special_details 
; 
 All esds (except the esd in the dihedral angle between two l.s. planes) 
 are estimated using the full covariance matrix.  The cell esds are taken 
 into account individually in the estimation of esds in distances, angles 
 and torsion angles; correlations between esds in cell parameters are only 
 used when they are defined by crystal symmetry.  An approximate (isotropic) 
 treatment of cell esds is used for estimating esds involving l.s. planes. 
; 
 
loop_ 
 _geom_bond_atom_site_label_1 
 _geom_bond_atom_site_label_2 
 _geom_bond_distance 
 _geom_bond_site_symmetry_2 
 _geom_bond_publ_flag 
S1 O3 1.418(4) . ? 
S1 O2 1.434(3) . ? 
S1 N4 1.599(4) . ? 
S1 C3 1.755(6) . ? 
O1 C1 1.227(5) . ? 
N1 C1 1.321(6) . ? 
N1 C10 1.455(6) . ? 
N1 H1 0.8600 . ? 
N2 C2 1.362(6) . ? 
N2 C1 1.403(6) . ? 
N2 H2 0.8600 . ? 
N3 C2 1.325(5) . ? 
N3 H3A 0.8600 . ? 
N3 H3B 0.8600 . ? 
N4 C2 1.324(6) . ? 
C3 C8 1.170(19) . ? 
C3 C4 1.356(9) . ? 
C3 C8' 1.436(19) . ? 
C4 C5 1.411(13) . ? 
C4 H4 0.9300 . ? 
C5 C6 1.372(12) . ? 
C5 H5 0.9300 . ? 
C6 C7' 1.115(19) . ? 
C6 C7 1.36(2) . ? 
C6 C9 1.558(11) . ? 
C7 C8 1.42(2) . ? 
C7 H7 0.9300 . ? 
C8 H8 0.9300 . ? 
C7' C8' 1.40(2) . ? 
C7' H7' 0.9300 . ? 
C8' H8' 0.9300 . ? 
C9 H9A 0.9600 . ? 
C9 H9B 0.9600 . ? 
C9 H9C 0.9600 . ? 
C10 C11 1.522(8) . ? 
C10 H10A 0.9700 . ? 
C10 H10B 0.9700 . ? 
C11 C12 1.439(9) . ? 
C11 H11A 0.9700 . ? 
C11 H11B 0.9700 . ? 
C12 C13 1.516(9) . ? 
C12 H12A 0.9700 . ? 
C12 H12B 0.9700 . ? 
C13 C14 1.446(9) . ? 
C13 H13A 0.9700 . ? 
C13 H13B 0.9700 . ? 
C14 C15 1.492(9) . ? 
C14 H14A 0.9700 . ? 
C14 H14B 0.9700 . ? 
C15 C16 1.473(10) . ? 
C15 H15A 0.9700 . ? 
C15 H15B 0.9700 . ? 
C16 C17 1.472(10) . ? 
C16 H16A 0.9700 . ? 
C16 H16B 0.9700 . ? 
C17 C18 1.486(11) . ? 
C17 H17A 0.9700 . ? 
C17 H17B 0.9700 . ? 
C18 C19 1.425(11) . ? 
C18 H18A 0.9700 . ? 
C18 H18B 0.9700 . ? 
C19 C20 1.430(12) . ? 
C19 H19A 0.9700 . ? 
C19 H19B 0.9700 . ? 
C20 C21 1.424(13) . ? 
C20 H20A 0.9700 . ? 
C20 H20B 0.9700 . ? 
C21 H21A 0.9600 . ? 
C21 H21B 0.9600 . ? 
C21 H21C 0.9600 . ? 
S2 O6 1.427(3) . ? 
S2 O5 1.434(3) . ? 
S2 N8 1.594(4) . ? 
S2 C24 1.743(5) . ? 
O4 C22 1.231(5) . ? 
N5 C22 1.324(5) . ? 
N5 C31 1.464(6) . ? 
N5 H5A 0.8600 . ? 
N6 C23 1.362(5) . ? 
N6 C22 1.395(5) . ? 
N6 H6 0.8600 . ? 
N7 C23 1.306(5) . ? 
N7 H7A 0.8600 . ? 
N7 H7B 0.8600 . ? 
N8 C23 1.338(5) . ? 
C24 C29' 1.289(13) . ? 
C24 C25 1.311(11) . ? 
C24 C29 1.365(15) . ? 
C25 C26 1.392(14) . ? 
C25 H25 0.9300 . ? 
C26 C27 1.494(15) . ? 
C26 H26 0.9300 . ? 
C27 C28 1.073(19) . ? 
C27 C28' 1.330(19) . ? 
C27 C30 1.528(11) . ? 
C28 C29 1.37(3) . ? 
C28 H28 0.9300 . ? 
C29 H29 0.9300 . ? 
C28' C29' 1.44(2) . ? 
C28' H28' 0.9300 . ? 
C29' H29' 0.9300 . ? 
C30 H30A 0.9600 . ? 
C30 H30B 0.9600 . ? 
C30 H30C 0.9600 . ? 
C31 C32 1.508(8) . ? 
C31 H31A 0.9700 . ? 
C31 H31B 0.9700 . ? 
C32 C33 1.481(8) . ? 
C32 H32A 0.9700 . ? 
C32 H32B 0.9700 . ? 
C33 C34 1.519(8) . ? 
C33 H33A 0.9700 . ? 
C33 H33B 0.9700 . ? 
C34 C35 1.491(9) . ? 
C34 H34A 0.9700 . ? 
C34 H34B 0.9700 . ? 
C35 C36 1.512(10) . ? 
C35 H35A 0.9700 . ? 
C35 H35B 0.9700 . ? 
C36 C37 1.515(10) . ? 
C36 H36A 0.9700 . ? 
C36 H36B 0.9700 . ? 
C37 C38 1.490(11) . ? 
C37 H37A 0.9700 . ? 
C37 H37B 0.9700 . ? 
C38 C39 1.546(12) . ? 
C38 H38A 0.9700 . ? 
C38 H38B 0.9700 . ? 
C39 C40 1.460(13) . ? 
C39 H39A 0.9700 . ? 
C39 H39B 0.9700 . ? 
C40 C41 1.466(13) . ? 
C40 H40A 0.9700 . ? 
C40 H40B 0.9700 . ? 
C41 C42 1.433(16) . ? 
C41 H41A 0.9700 . ? 
C41 H41B 0.9700 . ? 
C42 H42A 0.9600 . ? 
C42 H42B 0.9600 . ? 
C42 H42C 0.9600 . ? 
 
loop_ 
 _geom_angle_atom_site_label_1 
 _geom_angle_atom_site_label_2 
 _geom_angle_atom_site_label_3 
 _geom_angle 
 _geom_angle_site_symmetry_1 
 _geom_angle_site_symmetry_3 
 _geom_angle_publ_flag 
O3 S1 O2 116.7(2) . . ? 
O3 S1 N4 106.4(2) . . ? 
O2 S1 N4 113.6(2) . . ? 
O3 S1 C3 106.8(3) . . ? 
O2 S1 C3 106.9(2) . . ? 
N4 S1 C3 105.7(2) . . ? 
C1 N1 C10 120.9(4) . . ? 
C1 N1 H1 119.5 . . ? 
C10 N1 H1 119.5 . . ? 
C2 N2 C1 126.6(4) . . ? 
C2 N2 H2 116.7 . . ? 
C1 N2 H2 116.7 . . ? 
C2 N3 H3A 120.0 . . ? 
C2 N3 H3B 120.0 . . ? 
H3A N3 H3B 120.0 . . ? 
C2 N4 S1 122.1(3) . . ? 
O1 C1 N1 123.7(5) . . ? 
O1 C1 N2 121.5(4) . . ? 
N1 C1 N2 114.8(4) . . ? 
N4 C2 N3 127.2(5) . . ? 
N4 C2 N2 115.1(4) . . ? 
N3 C2 N2 117.8(5) . . ? 
C8 C3 C4 126.5(11) . . ? 
C8 C3 C8' 19.4(12) . . ? 
C4 C3 C8' 107.2(10) . . ? 
C8 C3 S1 112.5(10) . . ? 
C4 C3 S1 120.9(6) . . ? 
C8' C3 S1 131.8(9) . . ? 
C3 C4 C5 120.2(9) . . ? 
C3 C4 H4 119.9 . . ? 
C5 C4 H4 119.9 . . ? 
C6 C5 C4 119.7(8) . . ? 
C6 C5 H5 120.2 . . ? 
C4 C5 H5 120.1 . . ? 
C7' C6 C7 21.5(14) . . ? 
C7' C6 C5 128.6(13) . . ? 
C7 C6 C5 109.2(11) . . ? 
C7' C6 C9 112.9(15) . . ? 
C7 C6 C9 132.9(13) . . ? 
C5 C6 C9 117.9(10) . . ? 
C6 C7 C8 132.0(16) . . ? 
C6 C7 H7 114.0 . . ? 
C8 C7 H7 114.0 . . ? 
C3 C8 C7 111.9(15) . . ? 
C3 C8 H8 124.0 . . ? 
C7 C8 H8 124.0 . . ? 
C6 C7' C8' 110.8(15) . . ? 
C6 C7' H7' 124.6 . . ? 
C8' C7' H7' 124.6 . . ? 
C7' C8' C3 132.3(14) . . ? 
C7' C8' H8' 113.9 . . ? 
C3 C8' H8' 113.9 . . ? 
C6 C9 H9A 109.5 . . ? 
C6 C9 H9B 109.5 . . ? 
H9A C9 H9B 109.5 . . ? 
C6 C9 H9C 109.5 . . ? 
H9A C9 H9C 109.5 . . ? 
H9B C9 H9C 109.5 . . ? 
N1 C10 C11 113.6(5) . . ? 
N1 C10 H10A 108.8 . . ? 
C11 C10 H10A 108.8 . . ? 
N1 C10 H10B 108.8 . . ? 
C11 C10 H10B 108.8 . . ? 
H10A C10 H10B 107.7 . . ? 
C12 C11 C10 118.2(5) . . ? 
C12 C11 H11A 107.7 . . ? 
C10 C11 H11A 107.7 . . ? 
C12 C11 H11B 107.8 . . ? 
C10 C11 H11B 107.8 . . ? 
H11A C11 H11B 107.1 . . ? 
C11 C12 C13 116.8(5) . . ? 
C11 C12 H12A 108.1 . . ? 
C13 C12 H12A 108.1 . . ? 
C11 C12 H12B 108.1 . . ? 
C13 C12 H12B 108.1 . . ? 
H12A C12 H12B 107.3 . . ? 
C14 C13 C12 118.1(6) . . ? 
C14 C13 H13A 107.8 . . ? 
C12 C13 H13A 107.8 . . ? 
C14 C13 H13B 107.8 . . ? 
C12 C13 H13B 107.8 . . ? 
H13A C13 H13B 107.1 . . ? 
C13 C14 C15 119.5(6) . . ? 
C13 C14 H14A 107.4 . . ? 
C15 C14 H14A 107.4 . . ? 
C13 C14 H14B 107.4 . . ? 
C15 C14 H14B 107.4 . . ? 
H14A C14 H14B 107.0 . . ? 
C16 C15 C14 117.1(6) . . ? 
C16 C15 H15A 108.0 . . ? 
C14 C15 H15A 108.0 . . ? 
C16 C15 H15B 108.0 . . ? 
C14 C15 H15B 108.0 . . ? 
H15A C15 H15B 107.3 . . ? 
C17 C16 C15 119.9(7) . . ? 
C17 C16 H16A 107.3 . . ? 
C15 C16 H16A 107.3 . . ? 
C17 C16 H16B 107.3 . . ? 
C15 C16 H16B 107.3 . . ? 
H16A C16 H16B 106.9 . . ? 
C16 C17 C18 118.2(7) . . ? 
C16 C17 H17A 107.8 . . ? 
C18 C17 H17A 107.7 . . ? 
C16 C17 H17B 107.8 . . ? 
C18 C17 H17B 107.8 . . ? 
H17A C17 H17B 107.1 . . ? 
C19 C18 C17 122.8(8) . . ? 
C19 C18 H18A 106.6 . . ? 
C17 C18 H18A 106.6 . . ? 
C19 C18 H18B 106.6 . . ? 
C17 C18 H18B 106.6 . . ? 
H18A C18 H18B 106.6 . . ? 
C18 C19 C20 121.6(9) . . ? 
C18 C19 H19A 106.9 . . ? 
C20 C19 H19A 106.9 . . ? 
C18 C19 H19B 106.9 . . ? 
C20 C19 H19B 106.9 . . ? 
H19A C19 H19B 106.7 . . ? 
C21 C20 C19 122.2(10) . . ? 
C21 C20 H20A 106.8 . . ? 
C19 C20 H20A 106.8 . . ? 
C21 C20 H20B 106.8 . . ? 
C19 C20 H20B 106.8 . . ? 
H20A C20 H20B 106.6 . . ? 
C20 C21 H21A 109.5 . . ? 
C20 C21 H21B 109.5 . . ? 
H21A C21 H21B 109.5 . . ? 
C20 C21 H21C 109.5 . . ? 
H21A C21 H21C 109.5 . . ? 
H21B C21 H21C 109.5 . . ? 
O6 S2 O5 116.5(2) . . ? 
O6 S2 N8 106.32(19) . . ? 
O5 S2 N8 113.7(2) . . ? 
O6 S2 C24 107.5(2) . . ? 
O5 S2 C24 107.0(2) . . ? 
N8 S2 C24 105.0(2) . . ? 
C22 N5 C31 120.6(4) . . ? 
C22 N5 H5A 119.7 . . ? 
C31 N5 H5A 119.7 . . ? 
C23 N6 C22 125.8(3) . . ? 
C23 N6 H6 117.1 . . ? 
C22 N6 H6 117.1 . . ? 
C23 N7 H7A 120.0 . . ? 
C23 N7 H7B 120.0 . . ? 
H7A N7 H7B 120.0 . . ? 
C23 N8 S2 120.8(3) . . ? 
O4 C22 N5 123.8(4) . . ? 
O4 C22 N6 121.8(4) . . ? 
N5 C22 N6 114.4(4) . . ? 
N7 C23 N8 126.7(4) . . ? 
N7 C23 N6 119.6(4) . . ? 
N8 C23 N6 113.7(3) . . ? 
C29' C24 C25 115.8(10) . . ? 
C29' C24 C29 42.0(12) . . ? 
C25 C24 C29 107.6(9) . . ? 
C29' C24 S2 117.1(8) . . ? 
C25 C24 S2 120.4(5) . . ? 
C29 C24 S2 129.8(8) . . ? 
C24 C25 C26 126.8(10) . . ? 
C24 C25 H25 116.6 . . ? 
C26 C25 H25 116.6 . . ? 
C25 C26 C27 113.1(10) . . ? 
C25 C26 H26 123.5 . . ? 
C27 C26 H26 123.4 . . ? 
C28 C27 C28' 48.0(17) . . ? 
C28 C27 C26 115.4(13) . . ? 
C28' C27 C26 107.5(10) . . ? 
C28 C27 C30 121.3(15) . . ? 
C28' C27 C30 127.0(10) . . ? 
C26 C27 C30 118.5(10) . . ? 
C27 C28 C29 124.3(15) . . ? 
C27 C28 H28 117.8 . . ? 
C29 C28 H28 117.8 . . ? 
C24 C29 C28 125.0(14) . . ? 
C24 C29 H29 117.5 . . ? 
C28 C29 H29 117.5 . . ? 
C27 C28' C29' 128.3(12) . . ? 
C27 C28' H28' 115.8 . . ? 
C29' C28' H28' 115.8 . . ? 
C24 C29' C28' 113.6(13) . . ? 
C24 C29' H29' 123.2 . . ? 
C28' C29' H29' 123.2 . . ? 
C27 C30 H30A 109.5 . . ? 
C27 C30 H30B 109.5 . . ? 
H30A C30 H30B 109.5 . . ? 
C27 C30 H30C 109.5 . . ? 
H30A C30 H30C 109.5 . . ? 
H30B C30 H30C 109.5 . . ? 
N5 C31 C32 113.3(4) . . ? 
N5 C31 H31A 108.9 . . ? 
C32 C31 H31A 108.9 . . ? 
N5 C31 H31B 108.9 . . ? 
C32 C31 H31B 108.9 . . ? 
H31A C31 H31B 107.7 . . ? 
C33 C32 C31 115.2(4) . . ? 
C33 C32 H32A 108.5 . . ? 
C31 C32 H32A 108.5 . . ? 
C33 C32 H32B 108.5 . . ? 
C31 C32 H32B 108.5 . . ? 
H32A C32 H32B 107.5 . . ? 
C32 C33 C34 112.7(5) . . ? 
C32 C33 H33A 109.0 . . ? 
C34 C33 H33A 109.0 . . ? 
C32 C33 H33B 109.0 . . ? 
C34 C33 H33B 109.0 . . ? 
H33A C33 H33B 107.8 . . ? 
C35 C34 C33 115.0(5) . . ? 
C35 C34 H34A 108.5 . . ? 
C33 C34 H34A 108.5 . . ? 
C35 C34 H34B 108.5 . . ? 
C33 C34 H34B 108.5 . . ? 
H34A C34 H34B 107.5 . . ? 
C34 C35 C36 114.0(6) . . ? 
C34 C35 H35A 108.8 . . ? 
C36 C35 H35A 108.8 . . ? 
C34 C35 H35B 108.8 . . ? 
C36 C35 H35B 108.8 . . ? 
H35A C35 H35B 107.7 . . ? 
C35 C36 C37 114.6(7) . . ? 
C35 C36 H36A 108.6 . . ? 
C37 C36 H36A 108.6 . . ? 
C35 C36 H36B 108.6 . . ? 
C37 C36 H36B 108.6 . . ? 
H36A C36 H36B 107.6 . . ? 
C38 C37 C36 115.7(7) . . ? 
C38 C37 H37A 108.4 . . ? 
C36 C37 H37A 108.4 . . ? 
C38 C37 H37B 108.4 . . ? 
C36 C37 H37B 108.4 . . ? 
H37A C37 H37B 107.4 . . ? 
C37 C38 C39 112.6(8) . . ? 
C37 C38 H38A 109.1 . . ? 
C39 C38 H38A 109.1 . . ? 
C37 C38 H38B 109.1 . . ? 
C39 C38 H38B 109.1 . . ? 
H38A C38 H38B 107.8 . . ? 
C40 C39 C38 115.0(9) . . ? 
C40 C39 H39A 108.5 . . ? 
C38 C39 H39A 108.5 . . ? 
C40 C39 H39B 108.5 . . ? 
C38 C39 H39B 108.5 . . ? 
H39A C39 H39B 107.5 . . ? 
C39 C40 C41 111.1(11) . . ? 
C39 C40 H40A 109.4 . . ? 
C41 C40 H40A 109.4 . . ? 
C39 C40 H40B 109.4 . . ? 
C41 C40 H40B 109.4 . . ? 
H40A C40 H40B 108.0 . . ? 
C42 C41 C40 111.1(12) . . ? 
C42 C41 H41A 109.4 . . ? 
C40 C41 H41A 109.4 . . ? 
C42 C41 H41B 109.4 . . ? 
C40 C41 H41B 109.4 . . ? 
H41A C41 H41B 108.0 . . ? 
C41 C42 H42A 109.5 . . ? 
C41 C42 H42B 109.5 . . ? 
H42A C42 H42B 109.5 . . ? 
C41 C42 H42C 109.5 . . ? 
H42A C42 H42C 109.5 . . ? 
H42B C42 H42C 109.5 . . ? 
 
loop_ 
 _geom_torsion_atom_site_label_1 
 _geom_torsion_atom_site_label_2 
 _geom_torsion_atom_site_label_3 
 _geom_torsion_atom_site_label_4 
 _geom_torsion 
 _geom_torsion_site_symmetry_1 
 _geom_torsion_site_symmetry_2 
 _geom_torsion_site_symmetry_3 
 _geom_torsion_site_symmetry_4 
 _geom_torsion_publ_flag 
O3 S1 N4 C2 163.1(4) . . . . ? 
O2 S1 N4 C2 33.3(5) . . . . ? 
C3 S1 N4 C2 -83.6(4) . . . . ? 
C10 N1 C1 O1 3.9(7) . . . . ? 
C10 N1 C1 N2 -177.2(4) . . . . ? 
C2 N2 C1 O1 -9.1(7) . . . . ? 
C2 N2 C1 N1 172.0(4) . . . . ? 
S1 N4 C2 N3 -13.0(7) . . . . ? 
S1 N4 C2 N2 167.7(3) . . . . ? 
C1 N2 C2 N4 177.9(4) . . . . ? 
C1 N2 C2 N3 -1.5(6) . . . . ? 
O3 S1 C3 C8 16(2) . . . . ? 
O2 S1 C3 C8 142(2) . . . . ? 
N4 S1 C3 C8 -97(2) . . . . ? 
O3 S1 C3 C4 -160.5(6) . . . . ? 
O2 S1 C3 C4 -35.0(6) . . . . ? 
N4 S1 C3 C4 86.4(6) . . . . ? 
O3 S1 C3 C8' 15(2) . . . . ? 
O2 S1 C3 C8' 141(2) . . . . ? 
N4 S1 C3 C8' -98(2) . . . . ? 
C8 C3 C4 C5 2(3) . . . . ? 
C8' C3 C4 C5 1.8(17) . . . . ? 
S1 C3 C4 C5 178.3(6) . . . . ? 
C3 C4 C5 C6 -2.8(12) . . . . ? 
C4 C5 C6 C7' 10(3) . . . . ? 
C4 C5 C6 C7 -1(2) . . . . ? 
C4 C5 C6 C9 179.5(8) . . . . ? 
C7' C6 C7 C8 -150(11) . . . . ? 
C5 C6 C7 C8 7(4) . . . . ? 
C9 C6 C7 C8 -174(3) . . . . ? 
C4 C3 C8 C7 3(4) . . . . ? 
C8' C3 C8 C7 3(7) . . . . ? 
S1 C3 C8 C7 -174(2) . . . . ? 
C6 C7 C8 C3 -8(5) . . . . ? 
C7 C6 C7' C8' 16(7) . . . . ? 
C5 C6 C7' C8' -12(4) . . . . ? 
C9 C6 C7' C8' 177(2) . . . . ? 
C6 C7' C8' C3 12(5) . . . . ? 
C8 C3 C8' C7' 174(12) . . . . ? 
C4 C3 C8' C7' -7(4) . . . . ? 
S1 C3 C8' C7' 178(3) . . . . ? 
C1 N1 C10 C11 80.2(6) . . . . ? 
N1 C10 C11 C12 62.0(8) . . . . ? 
C10 C11 C12 C13 -178.0(6) . . . . ? 
C11 C12 C13 C14 176.4(7) . . . . ? 
C12 C13 C14 C15 -175.1(8) . . . . ? 
C13 C14 C15 C16 173.4(8) . . . . ? 
C14 C15 C16 C17 -175.3(8) . . . . ? 
C15 C16 C17 C18 173.2(9) . . . . ? 
C16 C17 C18 C19 -179.0(10) . . . . ? 
C17 C18 C19 C20 177.1(11) . . . . ? 
C18 C19 C20 C21 176.5(12) . . . . ? 
O6 S2 N8 C23 -169.4(3) . . . . ? 
O5 S2 N8 C23 -39.9(4) . . . . ? 
C24 S2 N8 C23 76.8(4) . . . . ? 
C31 N5 C22 O4 -1.2(7) . . . . ? 
C31 N5 C22 N6 178.2(4) . . . . ? 
C23 N6 C22 O4 -5.0(7) . . . . ? 
C23 N6 C22 N5 175.5(4) . . . . ? 
S2 N8 C23 N7 16.2(6) . . . . ? 
S2 N8 C23 N6 -163.8(3) . . . . ? 
C22 N6 C23 N7 6.9(6) . . . . ? 
C22 N6 C23 N8 -173.1(4) . . . . ? 
O6 S2 C24 C29' 134.6(12) . . . . ? 
O5 S2 C24 C29' 8.7(13) . . . . ? 
N8 S2 C24 C29' -112.4(12) . . . . ? 
O6 S2 C24 C25 -75.3(7) . . . . ? 
O5 S2 C24 C25 158.7(7) . . . . ? 
N8 S2 C24 C25 37.6(7) . . . . ? 
O6 S2 C24 C29 85.9(15) . . . . ? 
O5 S2 C24 C29 -40.0(15) . . . . ? 
N8 S2 C24 C29 -161.1(15) . . . . ? 
C29' C24 C25 C26 -29.5(14) . . . . ? 
C29 C24 C25 C26 15.1(14) . . . . ? 
S2 C24 C25 C26 -179.9(8) . . . . ? 
C24 C25 C26 C27 -3.5(13) . . . . ? 
C25 C26 C27 C28 -22(2) . . . . ? 
C25 C26 C27 C28' 29.6(17) . . . . ? 
C25 C26 C27 C30 -177.6(9) . . . . ? 
C28' C27 C28 C29 -59(2) . . . . ? 
C26 C27 C28 C29 32(4) . . . . ? 
C30 C27 C28 C29 -173(2) . . . . ? 
C29' C24 C29 C28 102(4) . . . . ? 
C25 C24 C29 C28 -7(3) . . . . ? 
S2 C24 C29 C28 -170(2) . . . . ? 
C27 C28 C29 C24 -19(5) . . . . ? 
C28 C27 C28' C29' 79(3) . . . . ? 
C26 C27 C28' C29' -30(3) . . . . ? 
C30 C27 C28' C29' 180(2) . . . . ? 
C25 C24 C29' C28' 30(2) . . . . ? 
C29 C24 C29' C28' -57.9(18) . . . . ? 
S2 C24 C29' C28' -178.4(15) . . . . ? 
C27 C28' C29' C24 0(4) . . . . ? 
C22 N5 C31 C32 70.4(6) . . . . ? 
N5 C31 C32 C33 64.5(6) . . . . ? 
C31 C32 C33 C34 -176.7(5) . . . . ? 
C32 C33 C34 C35 -179.1(6) . . . . ? 
C33 C34 C35 C36 -177.1(7) . . . . ? 
C34 C35 C36 C37 -178.0(7) . . . . ? 
C35 C36 C37 C38 178.6(9) . . . . ? 
C36 C37 C38 C39 -176.0(9) . . . . ? 
C37 C38 C39 C40 174.2(10) . . . . ? 
C38 C39 C40 C41 -174.3(10) . . . . ? 
C39 C40 C41 C42 -177.5(12) . . . . ? 
 
_diffrn_measured_fraction_theta_max    0.997 
_diffrn_reflns_theta_full              25.00 
_diffrn_measured_fraction_theta_full   0.997 
_refine_diff_density_max    0.760 
_refine_diff_density_min   -0.393 
_refine_diff_density_rms    0.061 
